# Supplementary material
Source: ML conference proceedings conference paper supplement (https://aclanthology.org/P17-2103)
Supplement: Notes [file P17-2103.Notes.pdf]

## A Supplemental Material

### A.1 Details in Data Collection

We used the following cue phrases to retrieve potential counterfactual tweets (before tokenizing or POS tagging): *should, shulda, shuda, shudda, shudve, would, wuda, wulda, wudda, wudve, wlda, could, cudda, culda, cudve, must, might, ought, may, i'd, id, i d, wed, we d, youd, you'd, you d, wish, condition, provided, providing, so long as, unless, whether, suppose, supposing, imagine, rather, envision, envisioning, conceptualize, conceptualizing, conjure, conjuring, visualize, and visualizing*. Still, many random tweets are included in the dataset which do not have any counterfactual-related signs. For instance a tweet contains 'Wednesday' was collected because it had a counterfactual cue phrase 'wed' in its text. In this way, we successfully acquired the dataset which contains a reasonable base rate (10%) for this first evaluation of counterfactual classification, while also not being too far from the actual rate of counterfactuals in random tweets (1%) than an artificially balanced data set.

| Forms                   | Regular Expression Pattern                                                                                                                                                                                                                                                                                                                 |
|-------------------------|--------------------------------------------------------------------------------------------------------------------------------------------------------------------------------------------------------------------------------------------------------------------------------------------------------------------------------------------|
| Wish Verb               | <code>\. * (B<sub>wish</sub> B<sub>wishing</sub>) ((VB.* )(JJ/))</code>                                                                                                                                                                                                                                                                    |
| Conjunctive Normal      | <code>\. */CCJ/. * ((/VBD/) (/VBN) (/MD/(\w)*VB.*)) . */MD/</code>                                                                                                                                                                                                                                                                         |
| Conjunctive Converse    | <code>\. */MD/. */CCJ/. * ((/VBN/) (/VBD) (/MD/(\w)*VB.*))</code>                                                                                                                                                                                                                                                                          |
| Modal Normal            | <code>\. */MD/(\w)* ((/VBN) (/VBD)) . */MD/(\w)* ((/VBN/) (/VBD/) (/VB) (/VBZ))</code>                                                                                                                                                                                                                                                     |
| Verb Inversion          | <code>\. */(/(B<sub>had</sub>)/(\w)*/(\w)*((/NN/) (/NNP/) (/NNPS/) (/NNS/) (/PRP/)) . * ((/VBN/) (/VBD/)) . */MD/((B<sub>were</sub>)/(\w)*/(\w)*((/NN/) (/NN/) (/NNP/) (/NNPS/) (/NNS) (/PRP/)) . */MD/(/MD/. */VB.*/(B<sub>had</sub>)/(\w)*/(\w)*((/NN/) (/NNP/) (/NNPS/) (/NNS/) (/PRP/)) . * ((/VBN) (/VBD/)))</code>                   |
| Should Have             | <code>\. ((B<sub>should've</sub>)/MD/) ((B<sub>should</sub> B<sub>shouldn't</sub> shouldn't should'nt)/MD/(of B<sub>have</sub>)/IN/ VB/)) (\w)* ((/VBN/) (/VBD/))</code>                                                                                                                                                                   |
| Would Have / Could Have | <code>\. ((B<sub>would've</sub>)/MD/) ((B<sub>would</sub> B<sub>wouldn't</sub> wouldn't would'nt)/MD/(of B<sub>have</sub>)/IN/ VB/)) (\w)* ((/VBN/) (/VBD/))</code><br><code>\. ((B<sub>could've</sub>)/MD/) ((B<sub>could</sub> B<sub>couldn't</sub> couldn't could'nt)/MD/(of B<sub>have</sub>)/IN/ VB/)) (\w)* ((/VBN/) (/VBD/))</code> |

Table 1: Regular Expressions used for each of the seven forms of counterfactuals. (*B*: Empirical Synonyms from Brown Clusters, /XX/: part-of-speech tag adjoining token.)
